# Supplementary material for: The GTPase-Activating Protein FgGyp1 Is Important for Vegetative Growth, Conidiation, and Virulence and Negatively Regulates DON Biosynthesis in Fusarium graminearum
Source: PubMed Central journal article supplement (PMC7858271; doi:10.3389/fmicb.2021.621519), 2021-01-21
Supplement: Data_Sheet_1.pdf [file Data_Sheet_1.pdf]

**Table S1. List of the various fungal strains used in this study.**

| Strain            | Genotype description                                                                           | Reference            |
|-------------------|------------------------------------------------------------------------------------------------|----------------------|
| PH-1              | Wild type                                                                                      | (Cuomo et al., 2007) |
| $\Delta Fggyp1$   | FGSG_17336 deletion mutant in PH-1                                                             | (Zheng et al., 2020) |
| $\Delta Fggyp1-C$ | $\Delta Fggyp1$ strain expressing the FgGyp1-GFP construct                                     | This study           |
| FgGyp1-GFP+       | $\Delta Fggyp1$ strain expressing the FgGyp1-GFP and FgKex2-mCherry constructs                 | This study           |
| FgKex2-mCherry    |                                                                                                |                      |
| FgGyp1-GFP+       | $\Delta Fggyp1$ strain expressing the FgGyp1-GFP and FgBet3-mCherry constructs                 | This study           |
| FgBet3-mCherry    |                                                                                                |                      |
| FgGyp1-GFP+       | $\Delta Fggyp1$ strain expressing the FgGyp1-GFP and mCherry-FgGos1 constructs                 | This study           |
| mCherry-FgGos1    |                                                                                                |                      |
| PH-1+FgTri1-GFP   | PH-1 strain expressing the FgTri1-GFP construct                                                | This study           |
| $\Delta Fggyp1+$  | $\Delta Fggyp1$ strain expressing the FgTri1-GFP construct                                     | This study           |
| FgTri1-GFP        |                                                                                                |                      |
| PH-1+FgTri4-GFP   | PH-1 strain expressing the FgTri4-GFP construct                                                | This study           |
| $\Delta Fggyp1+$  | $\Delta Fggyp1$ strain expressing the FgTri4-GFP construct                                     | This study           |
| FgTri4-GFP        |                                                                                                |                      |
| $\Delta TBC$      | $\Delta Fggyp1$ strain expressing the FgGyp1 <sup><math>\Delta TBC</math></sup> -GFP construct | This study           |
| $\Delta N$        | $\Delta Fggyp1$ strain expressing the FgGyp1 <sup><math>\Delta N</math></sup> -GFP construct   | This study           |
| $\Delta C$        | $\Delta Fggyp1$ strain expressing the FgGyp1 <sup><math>\Delta C</math></sup> -GFP construct   | This study           |
| <i>R284K</i>      | $\Delta Fggyp1$ strain expressing the FgGyp1 <sup><i>R284K</i></sup> -GFP construct            | This study           |
| <i>R357K</i>      | $\Delta Fggyp1$ strain expressing the FgGyp1 <sup><i>R357K</i></sup> -GFP construct            | This study           |
| PH-1+GFP-FgSnc1   | PH-1 strain expressing the GFP-FgSnc1 construct                                                | (Zheng et al., 2020) |
| $\Delta Fggyp1+$  | $\Delta Fggyp1$ strain expressing the GFP-FgSnc1 construct                                     | This study           |
| GFP-FgSnc1        |                                                                                                |                      |

Cuomo, C.A., Gueldener, U., Xu, J.R., Trail, F., Turgeon, B.G., Di Pietro, A., Walton, J.D., Ma, L.J., Baker, S.E., Rep, M., Adam, G., Antoniw, J., Baldwin, T., Calvo, S., Chang, Y.L., Decaprio, D., Gale, L.R., Gnerre, S., Goswami, R.S., Hammond-Kosack, K., Harris, L.J., Hilburn, K., Kennell, J.C., Kroken, S., Magnuson, J.K., Mannhaupt, G., Mauceli, E., Mewes, H.W., Mitterbauer, R., Muehlbauer, G., Munsterkotter, M., Nelson, D., O'donnell, K., Ouellet, T., Qi,

W.H., Quesneville, H., Roncero, M.I.G., Seong, K.Y., Tetko, I.V., Urban, M., Waalwijk, C., Ward, T.J., Yao, J.Q., Birren, B.W., and Kistler, H.C. (2007). The *Fusarium graminearum* genome reveals a link between localized polymorphism and pathogen specialization. *Science* 317, 1400-1402.

Zheng, H., Li, L., Yu, Z., Yuan, Y., Zheng, Q., Xie, Q., Li, G., Abubakar, Y.S., Zhou, J., Wang, Z., and Zheng, W. (2020). FgSpa2 recruits FgMsb3, a Rab8 GAP, to the polarisome to regulate polarized trafficking, growth and pathogenicity in *Fusarium graminearum*. *New Phytol* 10.1111/nph.16935.

**Table S2. List of all primers involved in this study.**

| Primer           | Sequence (5'→3')                                                 | Application                         |
|------------------|------------------------------------------------------------------|-------------------------------------|
| FGSG_17336AF     | GCGAGTTAGCGGACAACC                                               |                                     |
| FGSG_17336AR     | <b>TTGACCTCCACTAGCTCCAGCCAAGCC</b> T<br>CATCATCCTCATAGCCCATC     |                                     |
| FGSG_17336BF     | <b>GAATAGAGTAGATGCCGACCGGGTT</b> T<br>G TTCCTCCAGAGCCTTCC        | <i>FgGYP1</i> deletion              |
| FGSG_17336BR     | CCCGTTTACTACACCACC                                               |                                     |
| FGSG_17336OF     | GCTCGCTCCTCGCATAAT                                               |                                     |
| FGSG_17336OR     | ACCACTTGCTGGGTGTCG                                               |                                     |
| FGSG_17336UA     | TTTTCAGCGTCCTATGTAGCC                                            |                                     |
| H853             | GACAGACGTCGCGGTGAGTT                                             |                                     |
| Fg17336CF        | <b>agggaacaaaagctgggtacc</b> TGCCTCTGATGACA<br>GAACCT            | FgGyp1-GFP                          |
| Fg17336GR        | <b>GCCGCCGCCGCCGCCAAGCTT</b> TAGTTGT<br>AAATTCGTGACGG            |                                     |
| FgGyp1-R284K-R1  | AGCAGCAGTTGCCAGGTAATGGCCTTAA<br>CCTCTTGCGGCACACCAG               | For R284K mutation                  |
| FgGyp1-R284K-F1  | TGGTCTGGTGTGCCGCAAGAGGTT <b>AAGG</b><br>CCATTACCTGGCAACTGCTG     |                                     |
| FgGyp1-R357K-R1  | TACAGCTCAATATGCGGGTTGGTCTTGG<br>GTACATCGATGCTGATTT               |                                     |
| FgGyp1-R357K-F1  | ACCAAATCAGCATCGATGTACCC <b>AAGAC</b><br>CAACCCGCATATTGAGCT       | For R357K mutation                  |
| 17336-TBC-R1     | CGGCACACCAGACCAGGCGA                                             |                                     |
| 17336-TBC-F1     | GGCAACTCGCCTGGTCTGGTGTGCCG <b>GA</b><br><b>CATGGATTTCAGGAGAT</b> | For TBC domain deletion             |
| 17336ZR          | CATGGTTCGATGACGAGAAGTGA<br>TCACTTCTCGTCATCGAACCATG <b>CAAGA</b>  |                                     |
| 17336-N-F        | <b>GGTTCGCGCCATTAC</b><br><b>GCCGCCGCCGCCGCCAAGCTT</b> GAGGAG    | For C/N-terminal deletion of FgGyp1 |
| 17336queC-R      | CTTATCGGACCATTT<br><b>agggaacaaaagctgggtacc</b> TCCCTTTCTCAGCC   |                                     |
| FgBet3CF         | GTAG                                                             |                                     |
| FgBet3CR         | <b>gcccttgctcaccataagctt</b> GTCATCCTCAGGTGG<br>CAGTT            | FgBet3-mCherry                      |
| FgGyp1-MBP-F     | <b>ATCGAGGGAAGGATTTTCAGAATTC</b> ATGT<br>GGTCATCTTCTGGAAG        |                                     |
| FgGyp1-MBP-R     | <b>GCCAGTGCCAAGCTTGCCTGCAG</b> TCATA<br>GTTGTAAATTCGTGA          | For MBP-FgGyp1                      |
| FgGyp1-TBC-MBP-F | <b>ATCGAGGGAAGGATTTTCAGAATTC</b> ATGC<br>AAGAGGTTTCGCGCCATTAC    | For MBP-TBC                         |

FgGyp1-TBC-M **GCCAGTGCCAAGCTTGCCTGCAG**TCAGA  
BP-R GGAGCTTATCGGACC

---

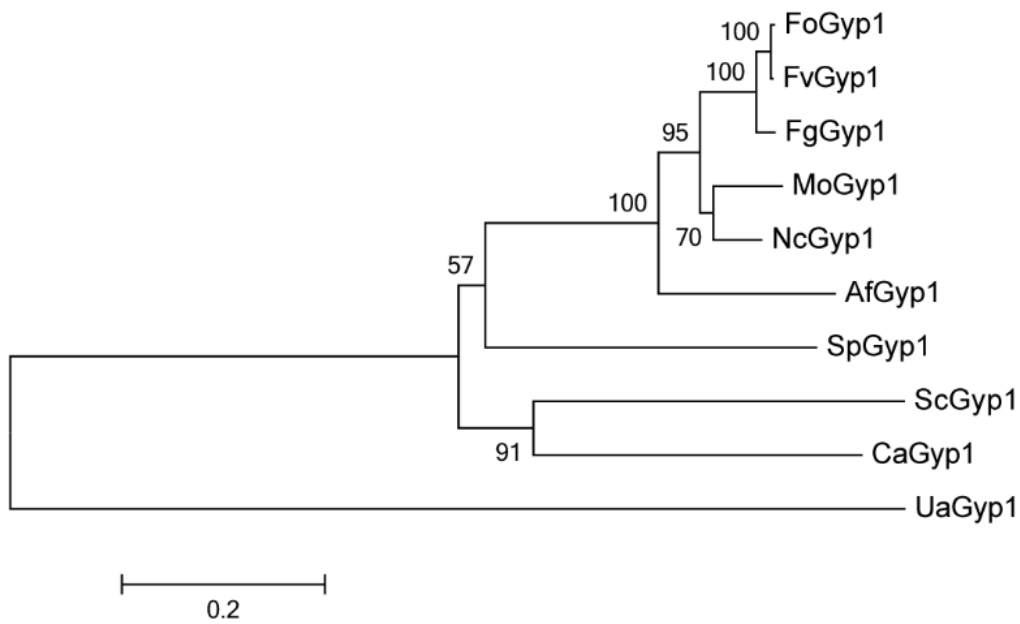

**Figure S1. Phylogenetic relationship of Gyp1 proteins from different organisms**

Sequence alignments were performed using the Clustal X 1.83 program and the calculated phylogenetic tree was viewed using Mega 6 program. A neighbour-joining tree with 10000 bootstrap replicates between the Gyp1 homologs in the different organisms.

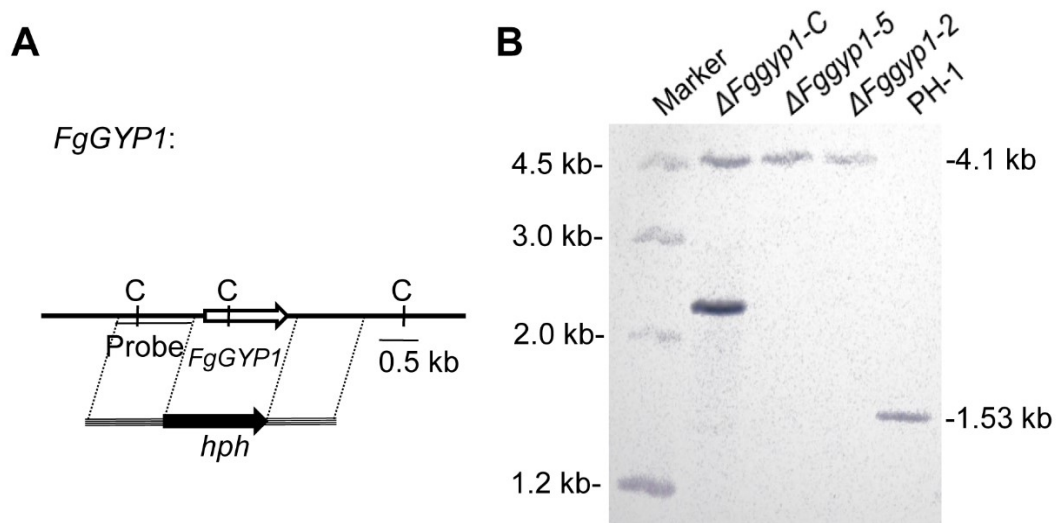

**Figure S2. Generation of *FgGYP1* deletion mutants and confirmation by Southern blot analysis**

(A) The split-marker approach was used to delete the *FgGYP1* gene. Genomic DNAs were extracted from PH-1 and the putative transformants. Schematic diagram of the genomic regions of *FgGYP1* and *hph* genes

(B) Targeted gene deletion of *FgGYP1*, *Cla*I (C) digested DNAs showed a 1.53 kb band in PH-1 and a 4.10 kb band in the mutants.

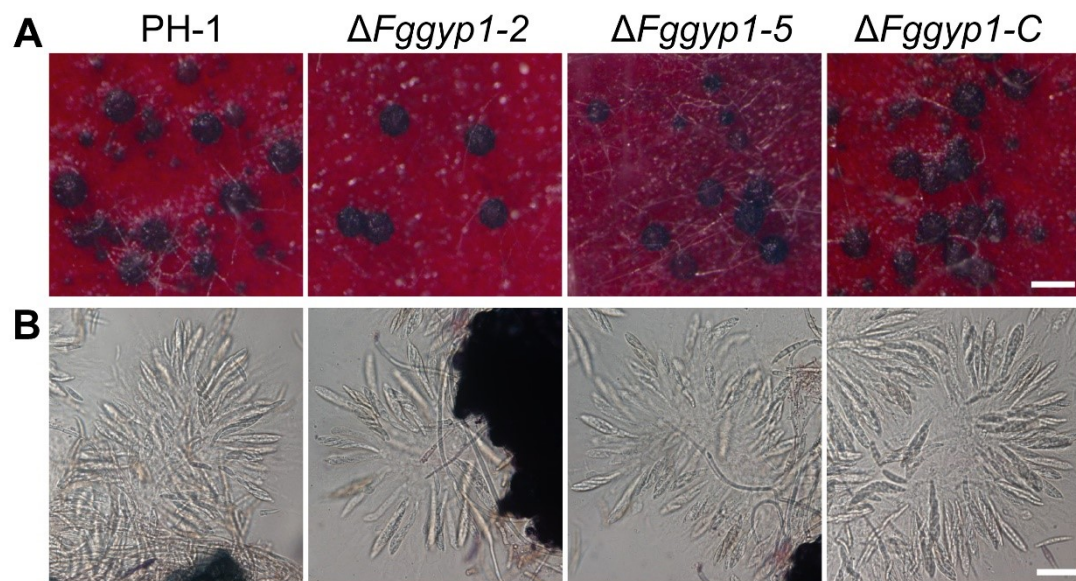

**Figure S3. FgGyp1 is dispensable for sexual reproduction**

(A) FgGyp1 is not required for perithecium formation. Bar = 200  $\mu$ m.

(B) FgGyp1 is not required for ascospore formation. Bar = 50  $\mu$ m.

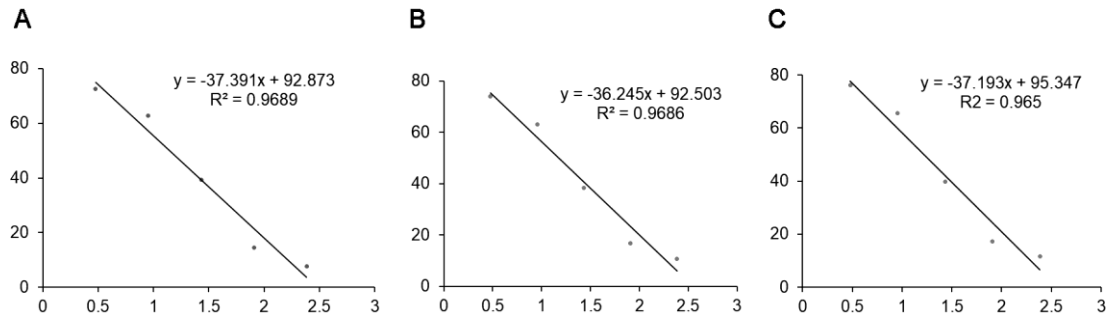

**Figure S4. The standard curves for quantification of the DON**

(A-C) The standard curves of three independent experiments for quantification of the DON. x: logarithm of the standard solution concentration. y: percentage of the standard solution absorbance.
